# Supplementary material for: Organomineral nanocomposite carbon burial during Oceanic Anoxic Event 2
Source: Copernicus journal article supplement (doi:10.5194/bg-11-4971-2014), 2014-09-18
Supplement: Supplementary file 1 [file bg-11-4971-2014-supplement.zip]

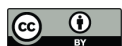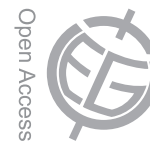

## *Supplement of*

# **Organomineral nanocomposite carbon burial during Oceanic Anoxic Event 2**

**S. C. Löhr and M. J. Kennedy**

*Correspondence to:* S. C. Löhr ([stefan.loehr@adelaide.edu.au](mailto:stefan.loehr@adelaide.edu.au))

- Supplement-Cover-Letter.pdf
- Loehr&Kennedy\_BG\_DataRepositoryTables.xlsx
- \_\_MACOSX
  - .\_Loehr&Kennedy\_BG\_DataRepositoryTables.xlsx
